# Supplementary material
Source: PubMed Central journal article supplement (PMC4913522)
Supplement: supp_gmw031_Supplementary_Figure_S1.pdf [file supp_gmw031_Supplementary_Figure_S1.pdf]

# Supplementary Fig.1

A

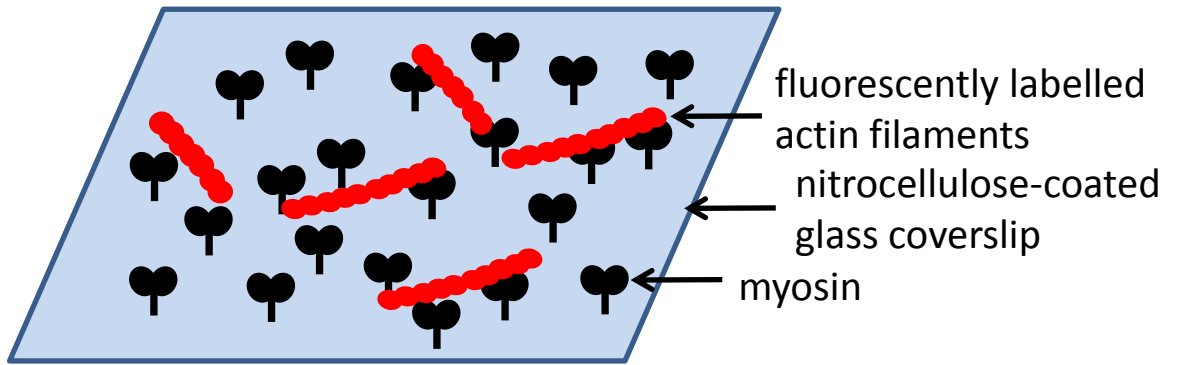

B

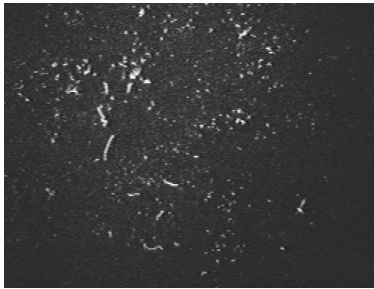

Ph·HC/PhRLC/PhELC

C

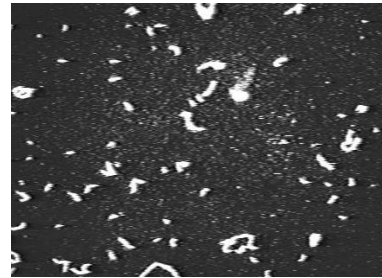

Ph·HC/ScRLC/PhELC

D

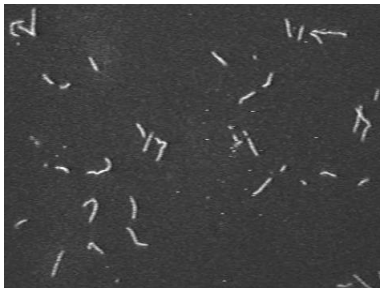

Ph·HC/PhRLC/ScELC

E

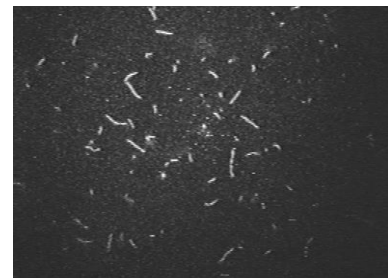

Ph·HC/ScRLC/ScELC

F

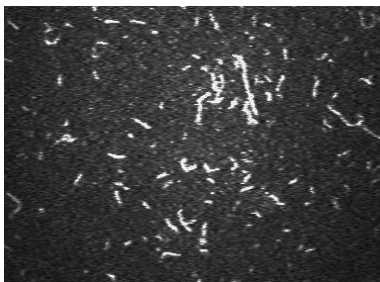

Ph·HC/PhRLC/PhELC-3A

G

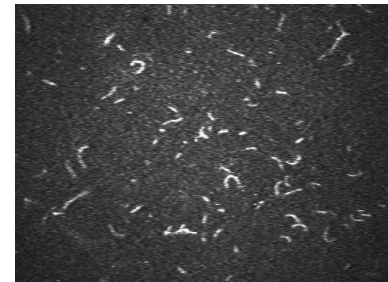

Ph·HC/ScRLC/PhELC-3A
