# Supplementary material
Source: PubMed Central journal article supplement (PMC4913522)
Supplement: supp_gmw031_Supplementary_Table_S1.pdf [file supp_gmw031_Supplementary_Table_S1.pdf]

## Supplementary Table 1

Total concentrations of  $\text{Ca}^{2+}$  in different pCa buffer

| $[\text{Ca}^{2+}]_{\text{total}}$ (M) | pCa |
|---------------------------------------|-----|
| $2.67 \times 10^{-5}$                 | 8   |
| $7.86 \times 10^{-5}$                 | 7   |
| $9.85 \times 10^{-5}$                 | 6   |
| $1.11 \times 10^{-4}$                 | 5   |
| $2.16 \times 10^{-4}$                 | 4   |
